# Supplementary material
Source: PubMed Central journal article supplement (PMC1570444)

Supplementary Data

Figure 1

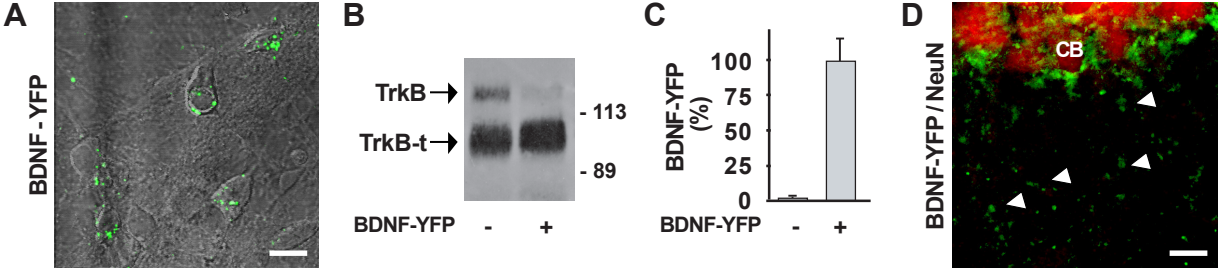

Supplement: 7601303s3.pdf [file 7601303s3.pdf]

## Supplementary Data

### Figure 2

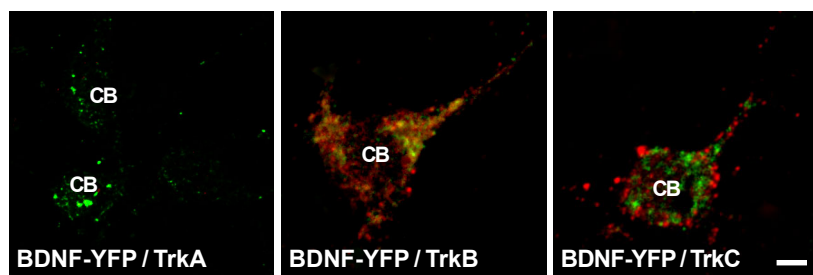

Supplement: 7601303s4.pdf [file 7601303s4.pdf]

Supplementary Data

Figure 3

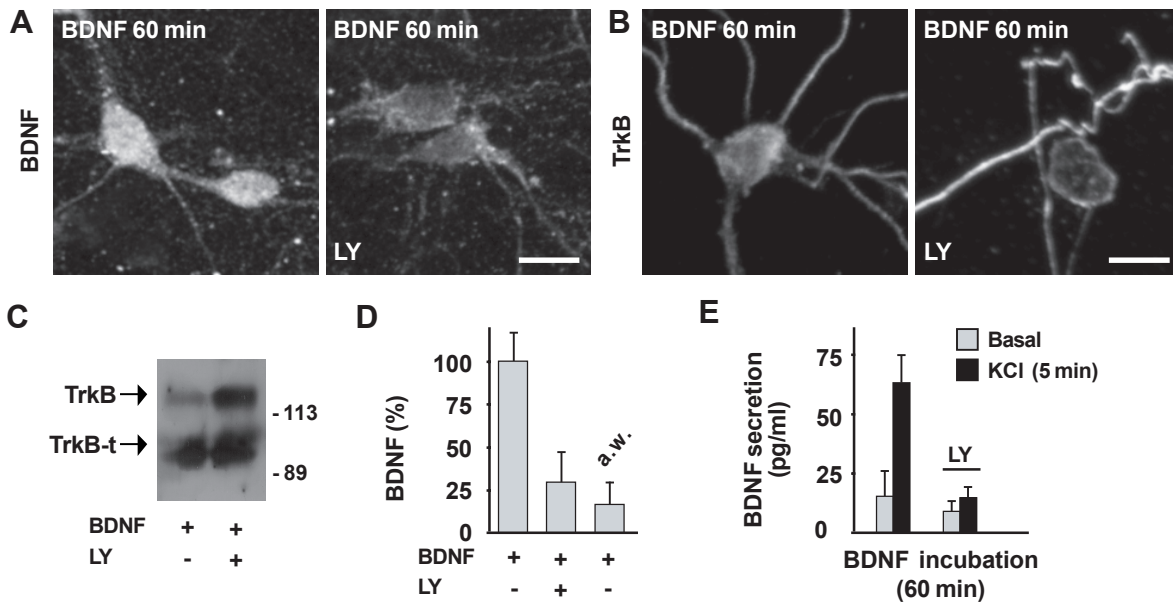

Supplement: 7601303s5.pdf [file 7601303s5.pdf]

# Supplementary Data

## Figure 4

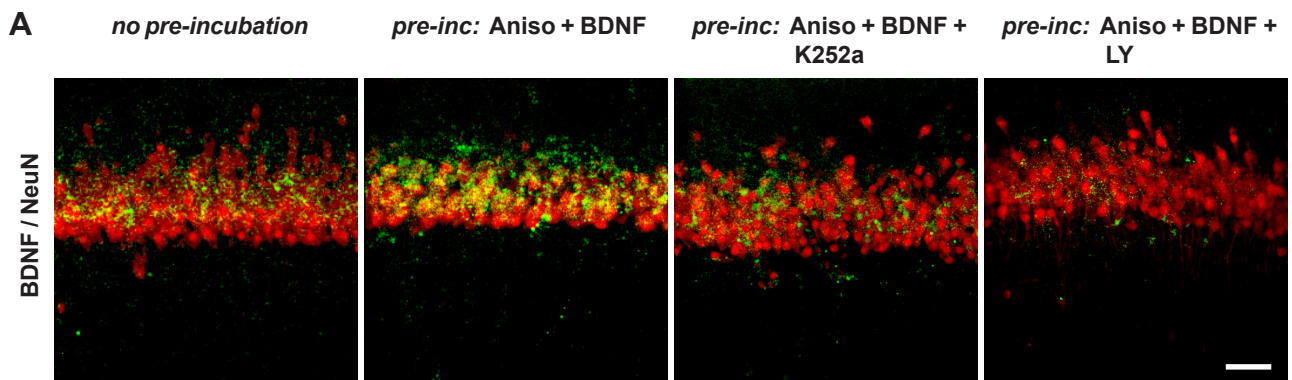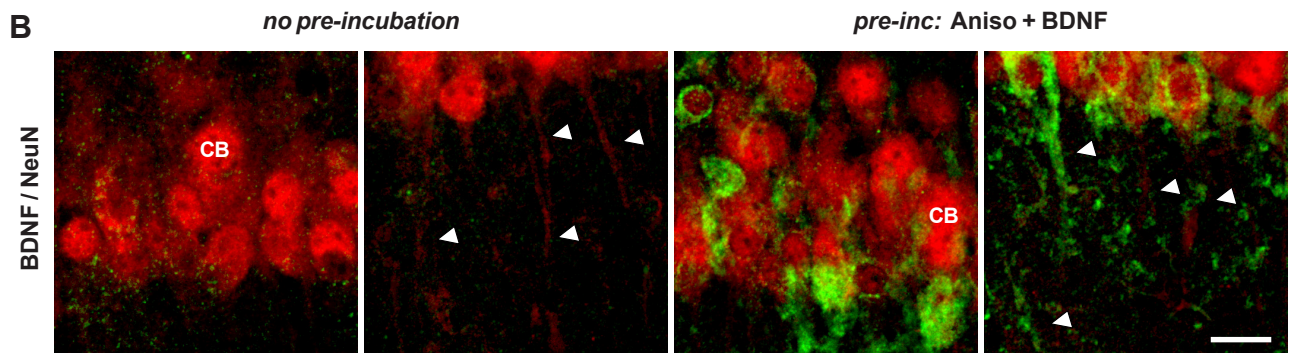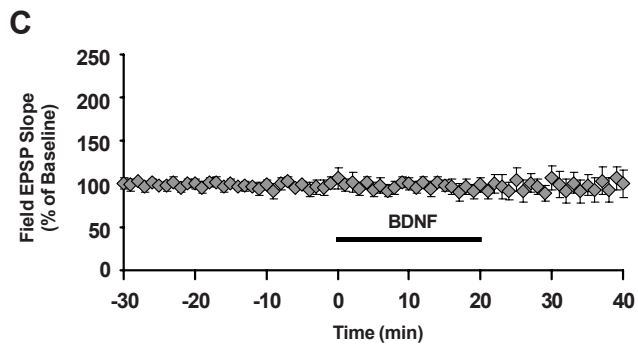

Supplement: 7601303s6.pdf [file 7601303s6.pdf]
